# Supplementary material for: Stability of OCT and OCTA in the Intensive Therapy Unit Setting
Source: MDPI journal article supplement (doi:10.3390/diagnostics11081516), 2021-08-23
Supplement: s1 [file s1]

## **Stability of OCT and OCTA in the intensive therapy unit setting.**

Ella F. Courtie<sup>1, 2, 3</sup>, Aditya U. Kale<sup>2</sup>, Benjamin TK. Hui<sup>2</sup>, Xiaoxuan Liu<sup>2, 4, 5, 6</sup>, Nicholas I. Capewell<sup>2</sup>, Jonathan RB. Bishop<sup>3</sup>, Tony Whitehouse<sup>7, 8</sup>, Tonny Veenith<sup>7, 8</sup>, Ann Logan<sup>9, 10</sup>, Alastair K. Denniston<sup>2, 4, 11, 12</sup>, Richard J. Blanch<sup>1, 2, 3, 13</sup>.

<sup>1</sup>Neuroscience and Ophthalmology, Institute of Inflammation and Ageing, College of Medical and Dental Sciences, University of Birmingham, UK

<sup>2</sup>Ophthalmology Department, University Hospitals Birmingham NHS Foundation Trust, Birmingham, UK

<sup>3</sup>NIHR Surgical Reconstruction and Microbiology Research Centre, University Hospitals Birmingham NHS Foundation Trust, Birmingham, UK

<sup>4</sup>Academic Unit of Ophthalmology, Institute of Inflammation and Ageing, College of Medical and Dental Sciences, University of Birmingham, UK

<sup>5</sup>Health Data Research UK, London, UK

<sup>6</sup>Moorfields Eye Hospital NHS Foundation Trust, UK

<sup>7</sup>Critical Care Unit, University Hospitals Birmingham NHS Foundation Trust, Birmingham, UK

<sup>8</sup>Birmingham Acute Care Research Group, Institute of Inflammation and Ageing, College of Medical and Dental Sciences, University of Birmingham, UK

<sup>9</sup>Axolotl Consulting Ltd, Droitwich, Worcestershire, WR9 0JS, UK

<sup>10</sup>Division of Biomedical Sciences, Warwick Medical School, University of Warwick, Coventry, CV4 7HL, UK

<sup>11</sup>NIHR Biomedical Research Centre for Ophthalmology, Moorfields Eye Hospital NHS Foundation Trust and UCL Institute of Ophthalmology, London, UK

<sup>12</sup>Centre for Regulatory Science and Innovation, Birmingham Health Partners, UK

<sup>13</sup>Academic Department of Military Surgery and Trauma, Royal Centre for Defence Medicine, Birmingham, UK

Corresponding author: Lt Col Richard Blanch, Institute of Inflammation and Ageing, College of Medical and Dental Sciences, University of Birmingham, United Kingdom.

Email: [r.j.blanch@bham.ac.uk](mailto:r.j.blanch@bham.ac.uk)

# Superficial vascular plexus

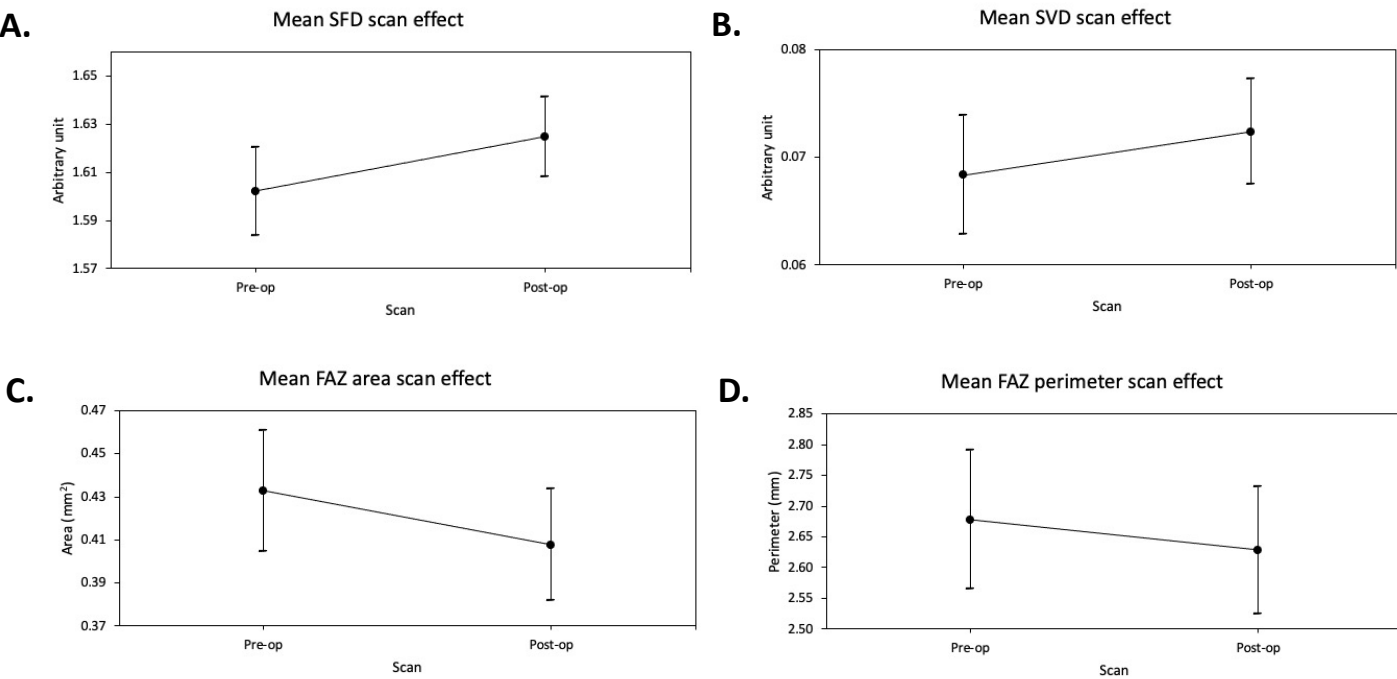

# Intermediate capillary plexus

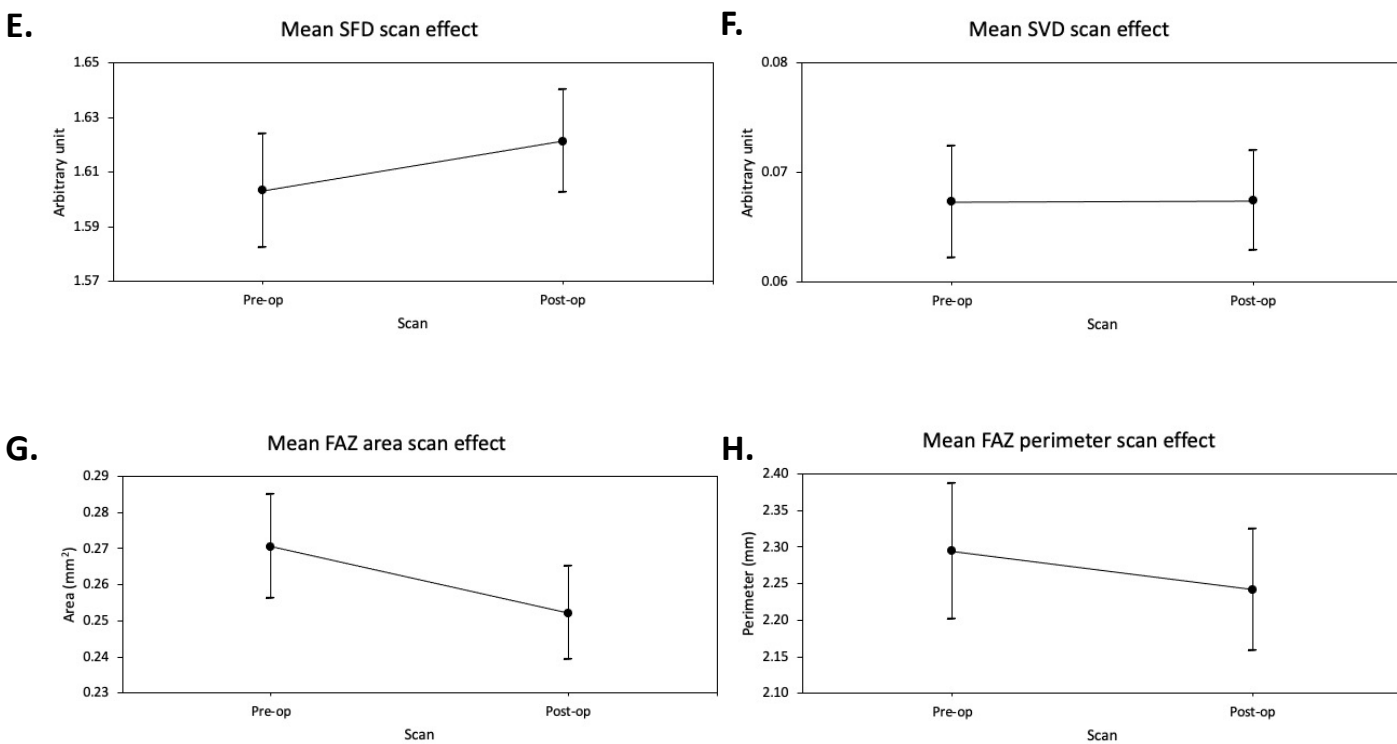

**Figure S1.** Superficial vascular plexus and intermediate capillary plexus patient timepoint effect mean graphs. Mean difference between scan time points for each measure, with no evidence of a systematic difference between timepoints. Error bars show the 95% confidence interval upper and lower limits. **A.** Mean difference in skeletal fractal dimension (SFD) of the superficial vascular plexus (SVP) between scans. **B.** Mean difference in skeletal vessel density (SVD) of the SVP between scans. **C.** Mean difference in foveal avascular zone (FAZ) area (measured in mm<sup>2</sup>) of the SVP between scans. **D.** Mean difference in FAZ perimeter (measured in mm) of the SVP between scans. **E.** Mean difference in SFD of the intermediate capillary plexus (ICP) between scans. **F.** Mean difference in SVD of the ICP between scans. **G.** Mean difference in the FAZ area (measured in mm<sup>2</sup>) of the ICP between scans. **H.** Mean difference in the FAZ perimeter (measured in mm) of the ICP between scans. Abbreviations. SVP: superficial vascular plexus; SFD: skeletal fractal dimensions; SVD: skeletal vessel density; FAZ: foveal avascular zone; ICP: intermediate capillary plexus.

# Retinal nerve fibre layer

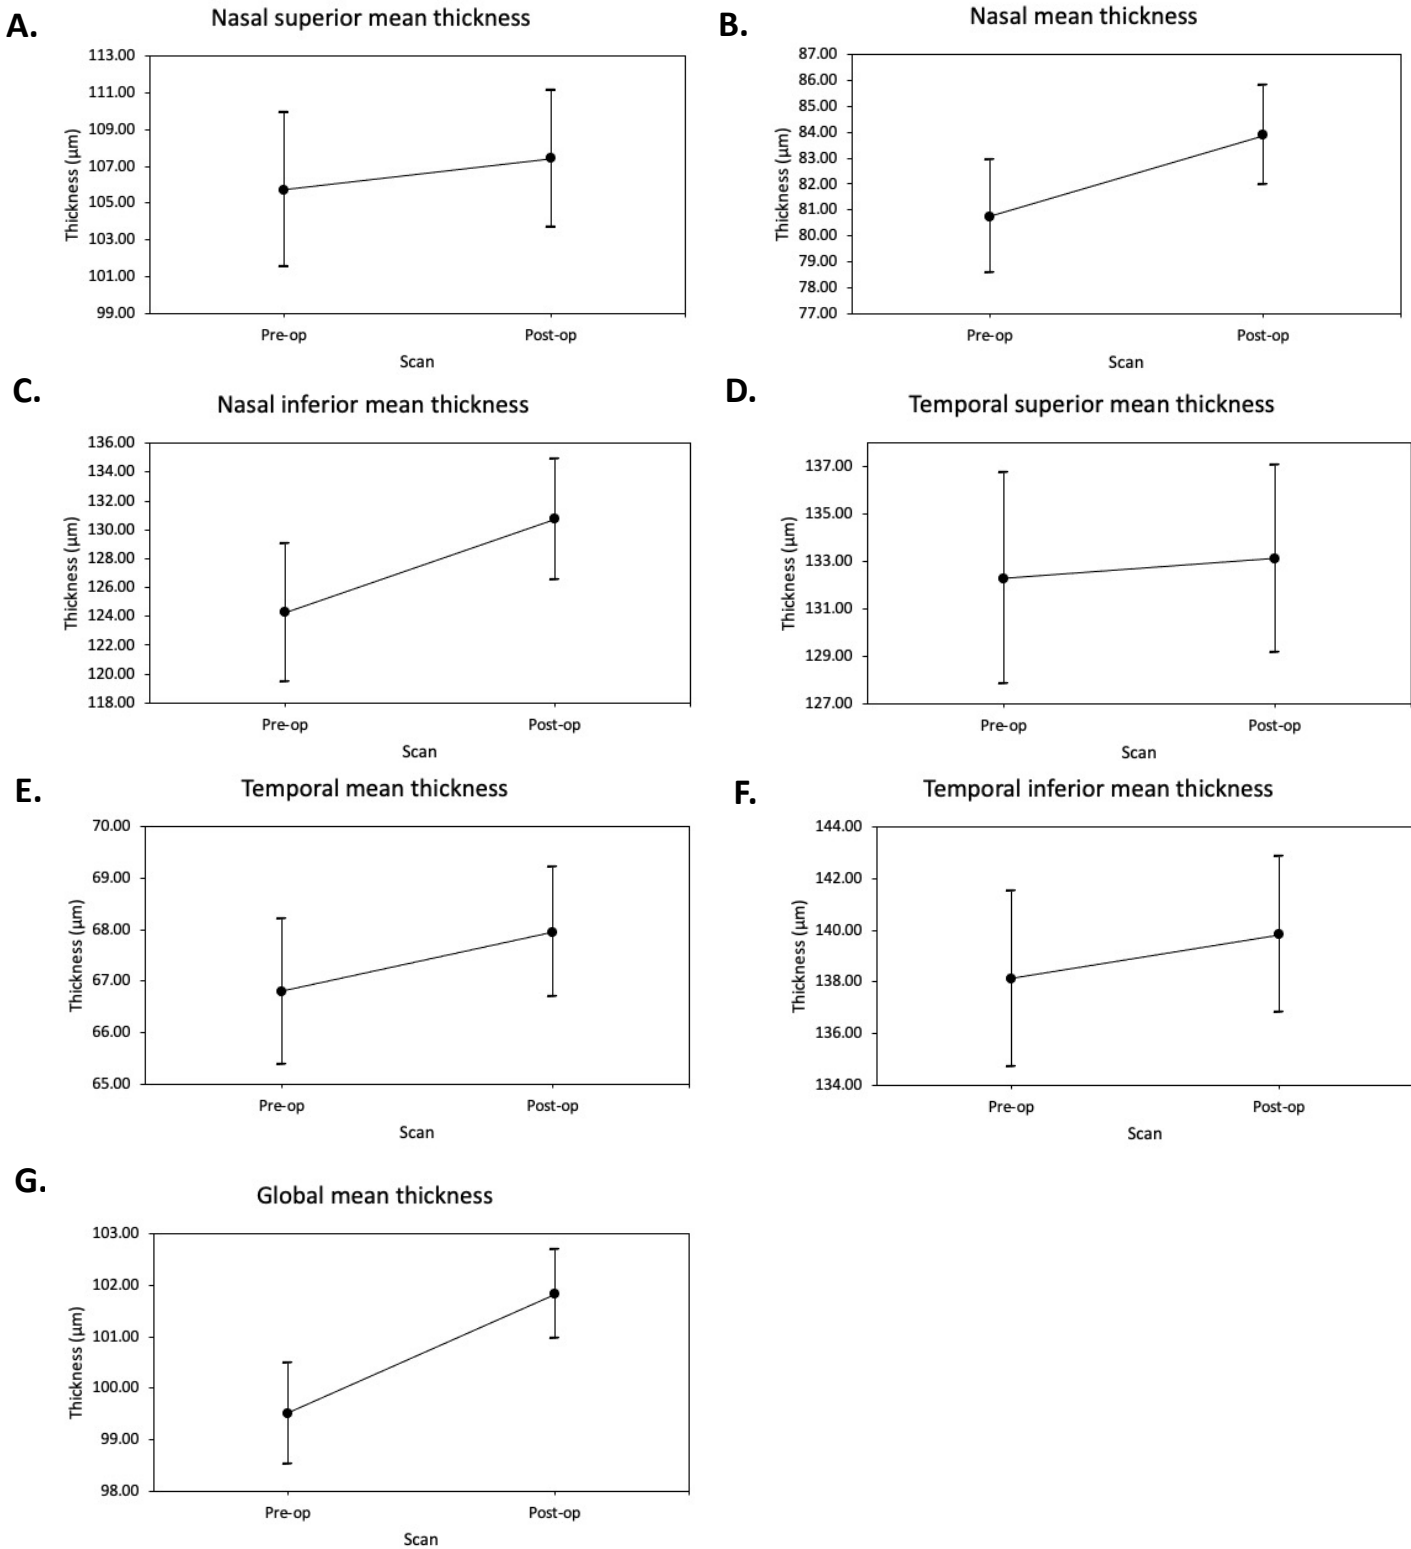

**Figure S2.** Retinal nerve fibre layer thickness - timepoint effect mean graphs. These graphs show the mean patient difference between each scan timepoint taken measuring the retinal nerve fibre layer (RNFL) thickness, in all 7 segments. All thicknesses are measured in  $\mu m$ . Error bars show the 95% confidence interval upper and lower limits.

**A.** Mean difference in RNFL nasal superior thickness between timepoints. **B.** Mean difference in RNFL nasal thickness between scans. **C.** Mean difference in RNFL nasal inferior thickness between timepoints. **D.** Mean difference in RNFL temporal superior thickness between timepoints. **E.** Mean difference in RNFL temporal thickness between timepoints. **F.** Mean difference in RNFL temporal inferior thickness between timepoints. **G.** Mean difference in RNFL global thickness between timepoints.

# Ganglion cell layer

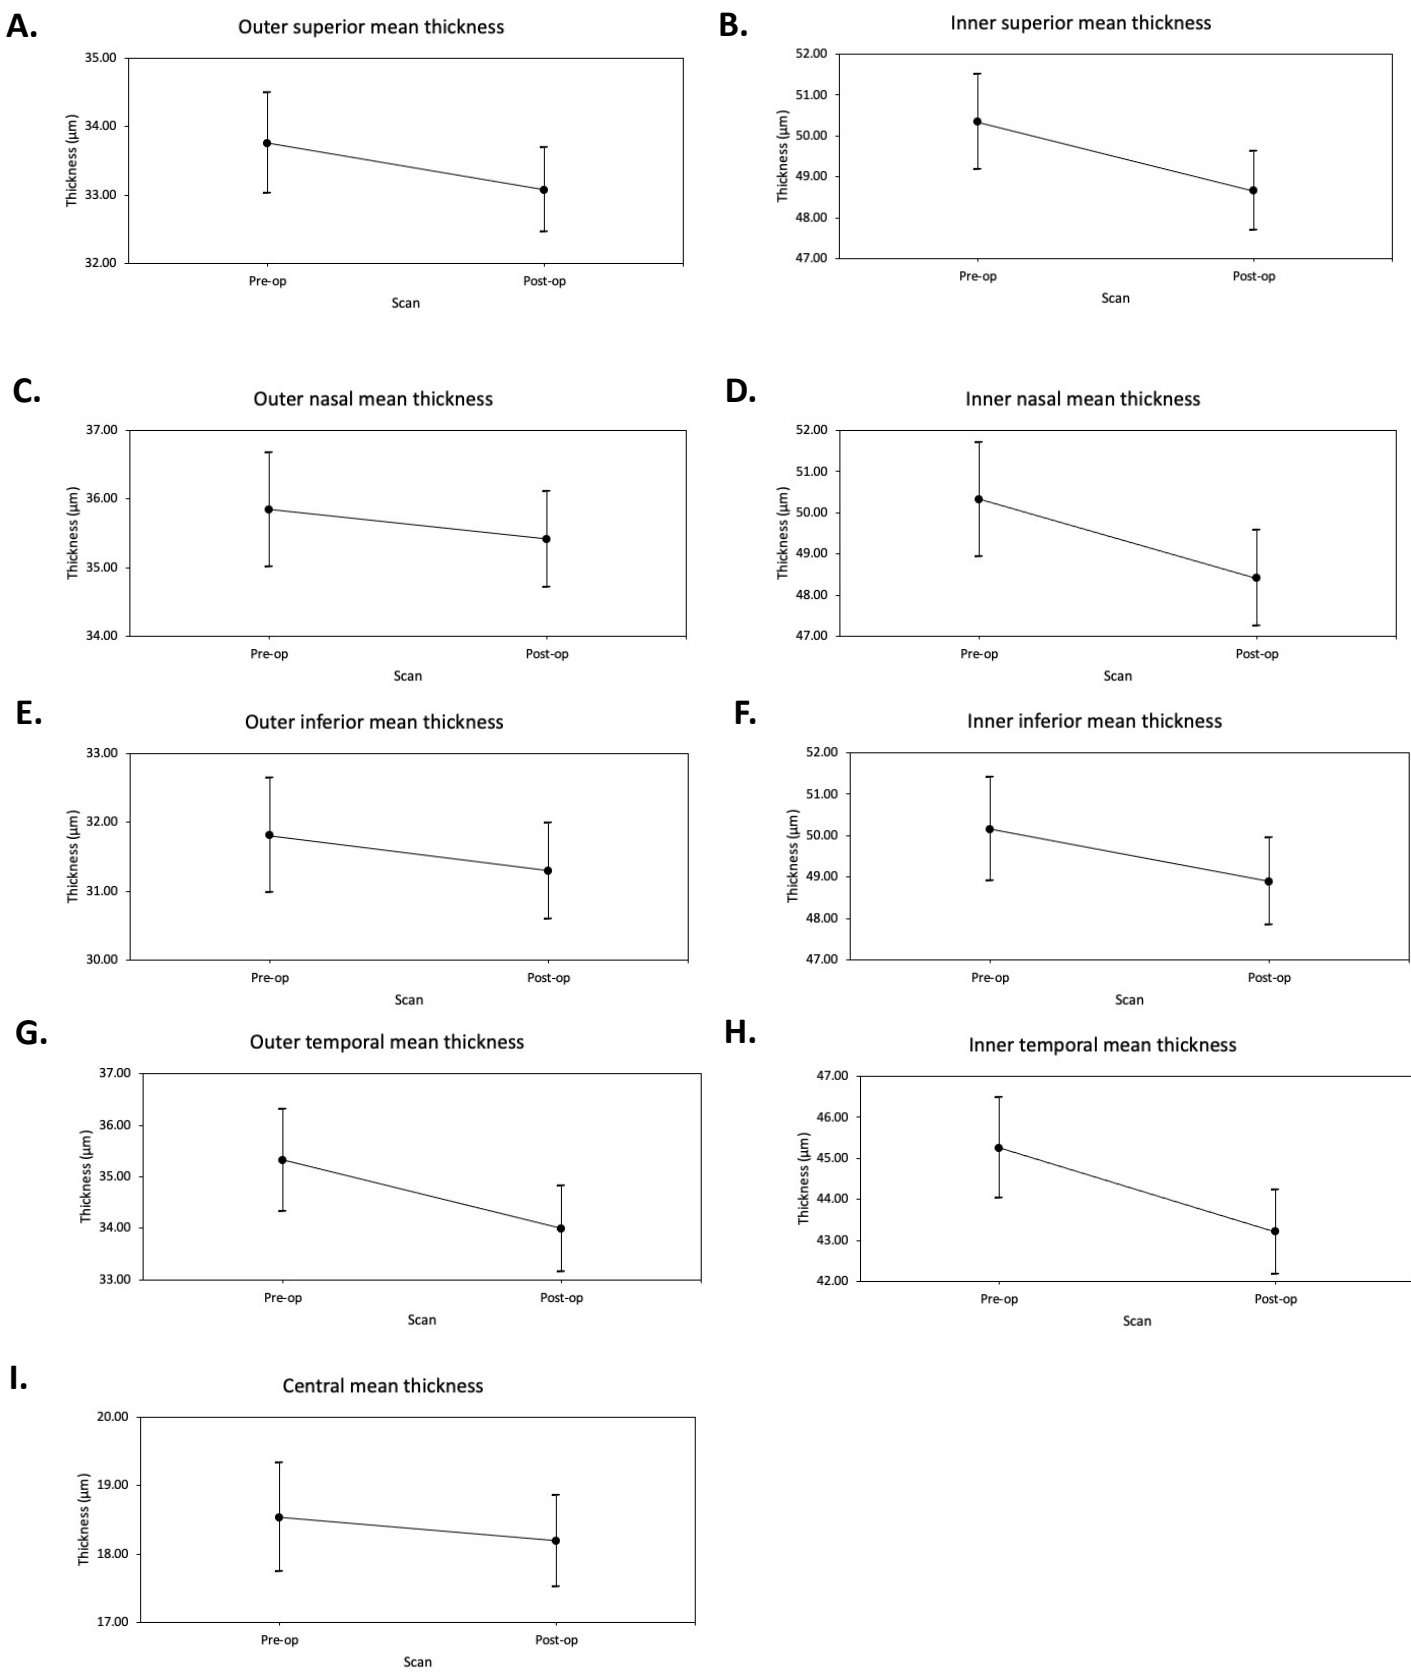

**Figure S3.** Ganglion cell layer thickness - timepoint effect mean graphs.  
Mean patient difference between each scan taken measuring the ganglion cell layer (GCL) thickness, in all 9 segments. All thicknesses are measured in  $\mu m$ . Error bars show the 95% confidence interval upper and lower limits.  
**A.** Mean difference in GCL outer superior thickness between timepoints. **B.** Mean difference in GCL inner superior thickness between timepoints. **C.** Mean difference in GCL outer nasal thickness between timepoints. **D.** Mean difference in GCL inner nasal thickness between timepoints. **E.** Mean difference in GCL outer inferior thickness between timepoints. **F.** Mean difference in GCL inner inferior thickness between timepoints. **G.** Mean difference in GCL outer temporal thickness between timepoints. **H.** Mean difference in GCL inner temporal thickness between timepoints. **I.** Mean difference in GCL central thickness between timepoints.

**Table S1a. Extent of scan completion in participants.** Abbreviations. OCT: optical coherence tomography; OCTA: optical coherence tomography angiography; OD: right eye; RNF: retinal nerve fibre layer.

| Participant | Pre-op scans                                                    | 24-48 hours post-op scans                                                                                      | 7 day post-op scans                                                                                 | Comments                      |
|-------------|-----------------------------------------------------------------|----------------------------------------------------------------------------------------------------------------|-----------------------------------------------------------------------------------------------------|-------------------------------|
| O1          | Well-tolerated, all scans obtained. Not dilated.                | Well-tolerated, all scans obtained. Dilated.                                                                   | Well-tolerated, all scans obtained. Dilated.                                                        | Uncomplicated post-op course. |
| O2          | Well-tolerated, all scans obtained.                             | Difficulty obtaining scans due to fatigue causing poor fixation. Dilated.                                      | Well-tolerated, all scans obtained with patient supine with pillows supporting their head. Dilated. | Uncomplicated post-op course. |
| O3          | Well-tolerated, all scans obtained.                             | OCT scans obtained but unable to collect OCTA scans due to fatigue. Dilated.                                   | Well-tolerated, all scans obtained with patient semi-recumbent.                                     | Uncomplicated post-op course. |
| O4          | Well-tolerated, all scans obtained.                             | Well-tolerated, all scans obtained with patient supine in bed with pillows supporting their head. Not dilated. | Well-tolerated, all scans obtained with patient semi-recumbent.                                     | Uncomplicated post-op course. |
| O5          | Well-tolerated, all scans obtained.                             | Only OD OCTA obtained due to patient experiencing pain. Dilated.                                               | Well-tolerated, all scans obtained with patient semi-recumbent. Not dilated.                        | Uncomplicated post-op course. |
| O6          | Well-tolerated, all scans obtained.                             | Some difficulty obtaining scans. Patient sitting in a chair with head unsupported.                             | Well-tolerated, all scans obtained with patient seated in a chair.                                  | Uncomplicated post-op course. |
| O7          | Well-tolerated, all scans obtained.                             | Well-tolerated, all scans obtained. Not dilated.                                                               | Unable to image as patient was discharged.                                                          | Uncomplicated post-op course. |
| O8          | Well-tolerated, all scans obtained with patient semi-recumbent. | Well-tolerated, all scans obtained with patient semi-recumbent. Dilated.                                       | Unable to image as patient was discharged.                                                          | Uncomplicated post-op course. |
| O9          | Well-tolerated, all scans obtained but poor fixation.           | Only OCT macula and RNFL obtained, due to patient experiencing pain and fatigue. Patient was seated. Dilated.  | Only macula scan obtained. Dilated.                                                                 | Uncomplicated post-op course. |
| O10         | Well-tolerated, all scans obtained but poor fixation.           | No scans obtained due to patient fatigue.                                                                      | No scans obtained.                                                                                  | Uncomplicated post-op course. |
| O11         | Well-tolerated, all scans obtained.                             | All scans obtained with patient supine in bed with the head supported by pillows. Dilated.                     | Well-tolerated, all scans obtained with patient seated in a chair. Not dilated.                     | Uncomplicated post-op course. |
| O12         | Well-tolerated, all scans obtained.                             | Well-tolerated, all scans obtained. Not dilated.                                                               | Well-tolerated, all scans obtained. Not dilated.                                                    | Uncomplicated post-op course. |
| O13         | Well-tolerated, all scans obtained.                             | Well-tolerated, all scans obtained. Dilated.                                                                   | NA                                                                                                  | Uncomplicated post-op course. |
| O14         | Well-tolerated, all scans obtained.                             | Well-tolerated, all scans obtained. Not dilated.                                                               | NA                                                                                                  | Uncomplicated post-op course. |
| O15         | Well-tolerated, all scans obtained.                             | Well-tolerated, all scans obtained. Not dilated.                                                               | NA                                                                                                  | Uncomplicated post-op course. |
| O16         | Well-tolerated, all scans obtained.                             | Well-tolerated, all scans obtained. Not dilated.                                                               | NA                                                                                                  | Uncomplicated post-op course. |
| O17         | Well-tolerated, all scans obtained.                             | Well-tolerated, all scans obtained. Not dilated.                                                               | NA                                                                                                  | Uncomplicated post-op course. |
| O18         | Well-tolerated, all scans obtained.                             | Well-tolerated, all scans obtained. Not dilated.                                                               | NA                                                                                                  | Uncomplicated post-op course. |

**Table S1b. Haemodynamic parameters of participants.** Abbreviations. BP: blood pressure; HR: heart rate; pO<sub>2</sub>: partial pressure of oxygen; FiO<sub>2</sub>: fraction of inspired oxygen

| Participant | 24-48 hour post-op scans |          |                       |                  | 7 day post-op scans |          |                      |
|-------------|--------------------------|----------|-----------------------|------------------|---------------------|----------|----------------------|
|             | BP (mmHg)                | HR (bpm) | pO <sub>2</sub> (kPa) | FiO <sub>2</sub> | BP (mmHg)           | HR (bpm) | SaO <sub>2</sub> (%) |
| O1          | 133/56                   | 66       | 9.7                   | 0.28             | 118/47              | 85       | 96                   |
| O2          | 119/63                   | 79       | 11.5                  | 0.40             | 138/88              | 97       | 97                   |
| O3          | 101/62                   | 88       | 9.6                   | 0.28             | 117/85              | 82       | 95                   |
| O4          | 116/61                   | 82       | 11.4                  | 0.28             | 132/84              | 84       | 95                   |
| O5          | 122/66                   | 83       | 9.0                   | 0.70             | 124/64              | 63       | 93                   |
| O6          | 133/57                   | 70       | 12.2                  | 0.24             | 135/79              | 91       | 96                   |
| O7          | 114/53                   | 53       | 13.8                  | 0.24             | NA                  | NA       | NA                   |
| O8          | 126/58                   | 72       | 9.9                   | 0.36             | NA                  | NA       | NA                   |
| O9          | 124/68                   | 65       | 11.3                  | 0.50             | 144/76              | 101      | 95                   |
| O10         | 115/57                   | 73       | 12.3                  | 0.24             | NA                  | NA       | NA                   |
| O11         | 120/68                   | 80       | 11.7                  | 0.25             | 127/84              | 70       | 95                   |
| O12         | 126/68                   | 69       | 12.1                  | 0.28             | 118/64              | 70       | 95                   |
| O13         | 108/67                   | 83       | 10.6                  | 0.50             | NA                  | NA       | NA                   |
| O14         | 102/59                   | 75       | 5.3                   | 0.26             | NA                  | NA       | NA                   |
| O15         | 130/75                   | 78       | 10.7                  | 0.36             | NA                  | NA       | NA                   |
| O16         | 118/53                   | 80       | 9.9                   | 0.28             | NA                  | NA       | NA                   |
| O17         | 147/93                   | 108      | 10.3                  | 0.28             | NA                  | NA       | NA                   |
| O18         | 124/85                   | 73       | 4.8                   | 0.21             | NA                  | NA       | NA                   |

**Table S2.** Mean difference between timepoints (1, pre-op; 2 and 3, 24 h and 7 days post-op) of the retinal nerve fibre layer and ganglion cell layer thicknesses (measured in  $\mu\text{m}$ ).

| Retinal layer             | Segment           | Timepoint    | Mean thickness ( $\mu\text{m}$ ) | 95% confidence interval ( $\mu\text{m}$ ) |
|---------------------------|-------------------|--------------|----------------------------------|-------------------------------------------|
| Retinal nerve fibre layer | Nasal superior    | 1<br>2 and 3 | 105.715<br>107.432               | 101.513 to 109.917<br>103.705 to 111.158  |
|                           | Nasal             | 1<br>2 and 3 | 80.744<br>83.885                 | 78.568 to 82.920<br>81.956 to 85.815      |
|                           | Nasal inferior    | 1<br>2 and 3 | 124.249<br>130.711               | 119.495 to 129.003<br>126.495 to 134.927  |
|                           | Temporal superior | 1<br>2 and 3 | 132.284<br>133.115               | 127.823 to 136.746<br>129.158 to 137.072  |
|                           | Temporal          | 1<br>2 and 3 | 66.802<br>67.953                 | 65.389 to 68.215<br>66.700 to 69.206      |
|                           | Temporal inferior | 1<br>2 and 3 | 138.120<br>139.837               | 134.725 to 141.514<br>136.826 to 142.847  |
|                           | Global            | 1<br>2 and 3 | 99.510<br>101.821                | 98.535 to 100.486<br>100.956 to 102.687   |
| Ganglion cell layer       | Outer superior    | 1<br>2 and 3 | 33.757<br>33.071                 | 33.025 to 34.490<br>32.455 to 33.687      |
|                           | Inner superior    | 1<br>2 and 3 | 50.339<br>48.656                 | 49.179 to 51.499<br>47.681 to 49.631      |
|                           | Outer nasal       | 1<br>2 and 3 | 35.844<br>35.418                 | 35.012 to 36.676<br>34.718 to 36.117      |
|                           | Inner nasal       | 1<br>2 and 3 | 50.318<br>48.405                 | 48.941 to 51.696<br>47.247 to 49.563      |
|                           | Outer inferior    | 1<br>2 and 3 | 31.812<br>31.297                 | 30.979 to 32.645<br>30.597 to 31.998      |
|                           | Inner inferior    | 1<br>2 and 3 | 50.155<br>48.889                 | 48.904 to 51.406<br>47.837 to 49.941      |
|                           | Outer temporal    | 1<br>2 and 3 | 35.323<br>33.994                 | 34.335 to 36.311<br>33.163 to 34.825      |
|                           | Inner temporal    | 1<br>2 and 3 | 45.250<br>43.209                 | 44.025 to 46.475<br>42.179 to 44.239      |
|                           | Central           | 1<br>2 and 3 | 18.537<br>18.188                 | 17.736 to 19.338<br>17.515 to 18.861      |

**Table S3.** Summary of vessel layer densities, including standard deviation (SD). N refers to number of scans included for each eye – left (OS) and right (OD). Timepoints: 1, pre-op; 2, 24 h and 7 days post-op. Abbreviations. FAZ: foveal avascular zone.

| Vessel Layer                  | Measure                     | Scan | OS |       |       | OD |       |       |
|-------------------------------|-----------------------------|------|----|-------|-------|----|-------|-------|
|                               |                             |      | N  | Mean  | SD    | N  | Mean  | SD    |
| Superficial vascular plexus   | Skeletal fractal dimension  | 1    | 18 | 1.588 | 0.084 | 17 | 1.613 | 0.054 |
|                               |                             | 2    | 16 | 1.623 | 0.061 | 15 | 1.638 | 0.042 |
|                               |                             | 3    | 6  | 1.583 | 0.076 | 6  | 1.647 | 0.031 |
|                               | Skeletal density            | 1    | 18 | 0.065 | 0.025 | 17 | 0.070 | 0.019 |
|                               |                             | 2    | 16 | 0.072 | 0.021 | 15 | 0.077 | 0.019 |
|                               |                             | 3    | 6  | 0.058 | 0.022 | 6  | 0.080 | 0.015 |
|                               | FAZ area (mm <sup>2</sup> ) | 1    | 17 | 0.472 | 0.212 | 17 | 0.421 | 0.167 |
|                               |                             | 2    | 15 | 0.415 | 0.147 | 15 | 0.375 | 0.122 |
|                               |                             | 3    | 4  | 0.385 | 0.028 | 6  | 0.412 | 0.104 |
|                               | FAZ perimeter (mm)          | 1    | 17 | 2.759 | 0.650 | 17 | 2.649 | 0.440 |
|                               |                             | 2    | 15 | 2.651 | 0.583 | 15 | 2.475 | 0.440 |
|                               |                             | 3    | 4  | 2.593 | 0.169 | 6  | 2.830 | 0.527 |
| Intermediate capillary plexus | Skeletal fractal dimension  | 1    | 18 | 1.589 | 0.086 | 17 | 1.619 | 0.046 |
|                               |                             | 2    | 16 | 1.612 | 0.083 | 15 | 1.634 | 0.034 |
|                               |                             | 3    | 6  | 1.587 | 0.060 | 6  | 1.647 | 0.025 |
|                               | Skeletal density            | 1    | 18 | 0.064 | 0.023 | 17 | 0.070 | 0.012 |
|                               |                             | 2    | 16 | 0.066 | 0.021 | 15 | 0.071 | 0.014 |
|                               |                             | 3    | 6  | 0.055 | 0.016 | 6  | 0.076 | 0.012 |
|                               | FAZ area (mm <sup>2</sup> ) | 1    | 15 | 0.285 | 0.121 | 16 | 0.261 | 0.135 |
|                               |                             | 2    | 14 | 0.250 | 0.107 | 14 | 0.234 | 0.111 |
|                               |                             | 3    | 4  | 0.277 | 0.072 | 6  | 0.271 | 0.092 |
|                               | FAZ perimeter (mm)          | 1    | 15 | 2.368 | 0.486 | 16 | 2.191 | 0.535 |
|                               |                             | 2    | 14 | 2.252 | 0.610 | 14 | 2.102 | 0.526 |
|                               |                             | 3    | 4  | 2.638 | 0.516 | 6  | 2.367 | 0.410 |



**Table S4.** Summary of retinal structural layer thicknesses. N refers to number of scans included for each eye – left (OS) and right (OD). Timepoints: 1, pre-op; 2, 24 h and 7 days post-op.

| Retinal Layer             | Segment           | Scan | OS |      |     | OD |      |     |
|---------------------------|-------------------|------|----|------|-----|----|------|-----|
|                           |                   |      | N  | Mean | SD  | N  | Mean | SD  |
| Retinal nerve fibre layer | Nasal superior    | 1    | 18 | 107  | 30  | 17 | 98   | 21  |
|                           |                   | 2    | 16 | 108  | 31  | 15 | 102  | 22  |
|                           |                   | 3    | 7  | 128  | 30  | 6  | 113  | 17  |
|                           | Nasal             | 1    | 18 | 78   | 12  | 17 | 83   | 12  |
|                           |                   | 2    | 16 | 83   | 16  | 15 | 87   | 16  |
|                           |                   | 3    | 7  | 81   | 17  | 6  | 83   | 15  |
|                           | Nasal inferior    | 1    | 18 | 121  | 32  | 17 | 125  | 26  |
|                           |                   | 2    | 16 | 134  | 43  | 15 | 128  | 30  |
|                           |                   | 3    | 7  | 134  | 46  | 6  | 130  | 35  |
|                           | Temporal inferior | 1    | 18 | 140  | 22  | 17 | 133  | 24  |
|                           |                   | 2    | 16 | 141  | 26  | 15 | 138  | 28  |
|                           |                   | 3    | 7  | 152  | 29  | 6  | 138  | 36  |
|                           | Temporal          | 1    | 18 | 66   | 11  | 17 | 67   | 14  |
|                           |                   | 2    | 16 | 66   | 11  | 15 | 68   | 15  |
|                           |                   | 3    | 7  | 71   | 11  | 6  | 76   | 13  |
|                           | Temporal superior | 1    | 18 | 128  | 24  | 17 | 133  | 21  |
|                           |                   | 2    | 16 | 129  | 24  | 15 | 133  | 29  |
|                           |                   | 3    | 7  | 138  | 16  | 6  | 151  | 14  |
|                           | Global            | 1    | 18 | 98   | 13  | 17 | 99   | 13  |
|                           |                   | 2    | 16 | 101  | 14  | 15 | 101  | 14  |
|                           |                   | 3    | 7  | 107  | 13  | 6  | 106  | 14  |
| Ganglion cell layer       | Outer superior    | 1    | 18 | 32.8 | 5.8 | 17 | 33.9 | 4.9 |
|                           |                   | 2    | 17 | 33.1 | 4.3 | 16 | 34.0 | 4.6 |
|                           |                   | 3    | 8  | 31.4 | 5.2 | 8  | 34.6 | 4.0 |
|                           | Inner superior    | 1    | 18 | 49.8 | 5.0 | 17 | 50.2 | 6.7 |
|                           |                   | 2    | 17 | 47.8 | 4.5 | 16 | 49.3 | 6.8 |
|                           |                   | 3    | 8  | 47.8 | 9.1 | 8  | 51.5 | 4.5 |
|                           | Outer nasal       | 1    | 18 | 36.3 | 5.0 | 17 | 34.4 | 6.0 |
|                           |                   | 2    | 17 | 35.8 | 4.6 | 16 | 34.9 | 5.7 |
|                           |                   | 3    | 8  | 36.6 | 6.9 | 8  | 36.5 | 5.0 |
|                           | Inner nasal       | 1    | 18 | 49.7 | 5.8 | 17 | 50.5 | 5.6 |
|                           |                   | 2    | 17 | 46.7 | 6.2 | 16 | 49.7 | 6.8 |
|                           |                   | 3    | 8  | 48.4 | 6.8 | 8  | 50.5 | 6.2 |
|                           | Outer inferior    | 1    | 18 | 31.4 | 4.3 | 17 | 31.1 | 5.4 |
|                           |                   | 2    | 17 | 31.2 | 4.5 | 16 | 31.4 | 5.4 |
|                           |                   | 3    | 8  | 31.1 | 6.6 | 8  | 33.8 | 4.4 |
|                           | Inner inferior    | 1    | 18 | 50.1 | 5.0 | 17 | 49.9 | 5.5 |
|                           |                   | 2    | 17 | 48.8 | 4.6 | 16 | 48.6 | 8.4 |
|                           |                   | 3    | 8  | 50.6 | 4.8 | 8  | 48.6 | 5.6 |
|                           | Outer temporal    | 1    | 18 | 34.4 | 5.2 | 17 | 35.2 | 5.8 |
|                           |                   | 2    | 17 | 33.3 | 4.6 | 16 | 34.3 | 6.7 |
|                           |                   | 3    | 8  | 34.1 | 5.4 | 8  | 37.0 | 5.3 |
|                           | Inner temporal    | 1    | 18 | 45.4 | 4.5 | 17 | 44.7 | 6.0 |
|                           |                   | 2    | 17 | 43.8 | 5.7 | 16 | 42.8 | 7.0 |
|                           |                   | 3    | 8  | 43.3 | 6.3 | 8  | 43.5 | 3.5 |
|                           | Central           | 1    | 18 | 19.0 | 5.4 | 17 | 18.1 | 5.3 |
|                           |                   | 2    | 17 | 18.5 | 4.5 | 16 | 18.8 | 5.5 |
|                           |                   | 3    | 8  | 17.1 | 3.0 | 8  | 17.3 | 2.7 |
